# Supplementary material for: Light scattering in a three-phase photosensitive systemviaMonte Carlo approach
Source: Royal Society of Chemistry journal article supplement (doi:10.1039/d3sm00807j), 2023-01-01
Supplement: d3sm00807j1.pdf [file d3sm00807j1.pdf]

## Supplementary Information

# Light Scattering in a Three-Phase Photosensitive System via Monte Carlo Approach

Darshil M. Shah <sup>1</sup>, Joshua P. Morris <sup>1</sup>, Alireza V. Amirkhizi <sup>1</sup>, Christopher. J. Hansen <sup>1,\*</sup>

<sup>1</sup> Mechanical Engineering, University of Massachusetts Lowell, Lowell, MA 01854

\*Corresponding author: [Christoper\\_Hansen@uml.edu](mailto:Christoper_Hansen@uml.edu)

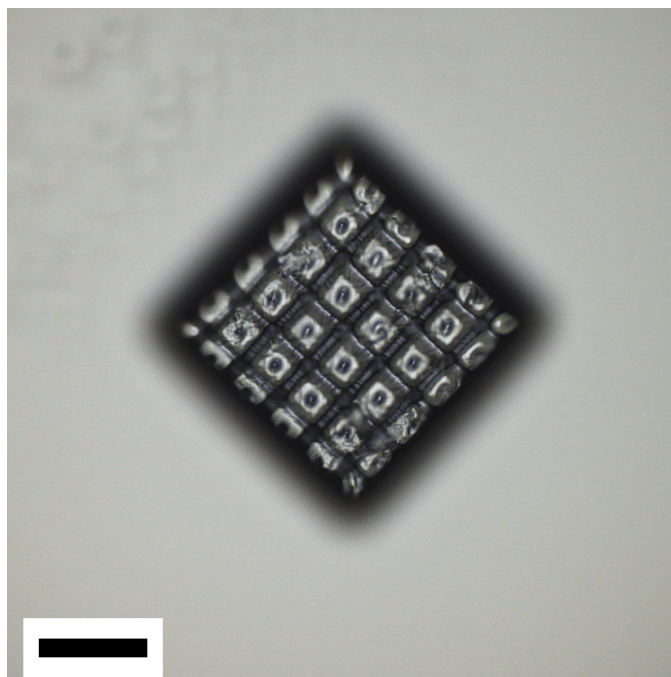

Figure S.1: Optical microscope image of the printed PR48 neat resin film on the glass slide.  
Scale bar 100  $\mu\text{m}$ .

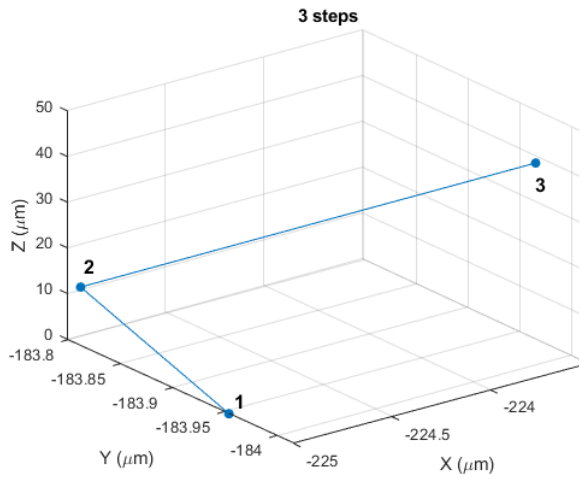

(a)

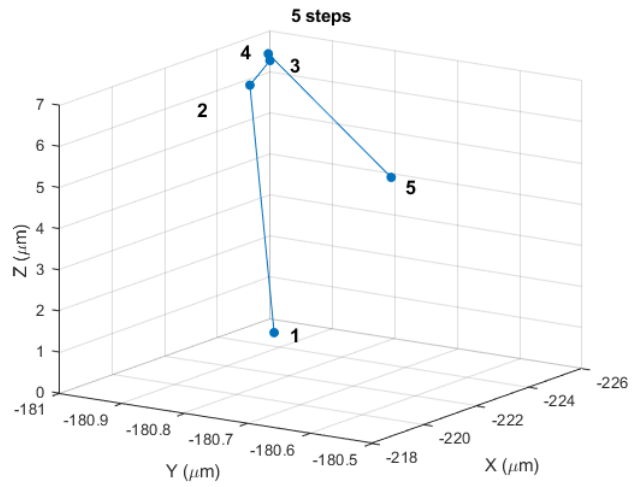

(b)

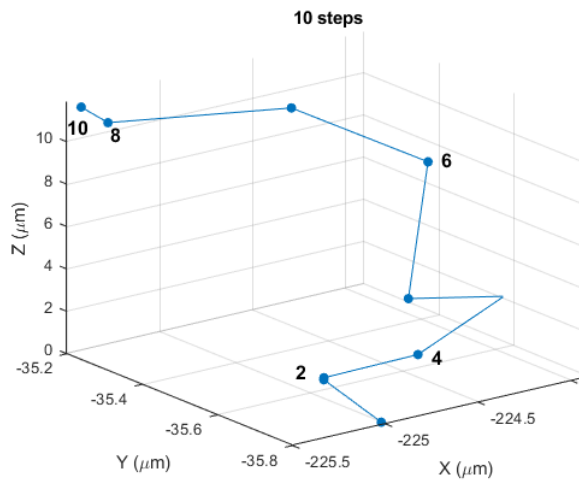

(c)

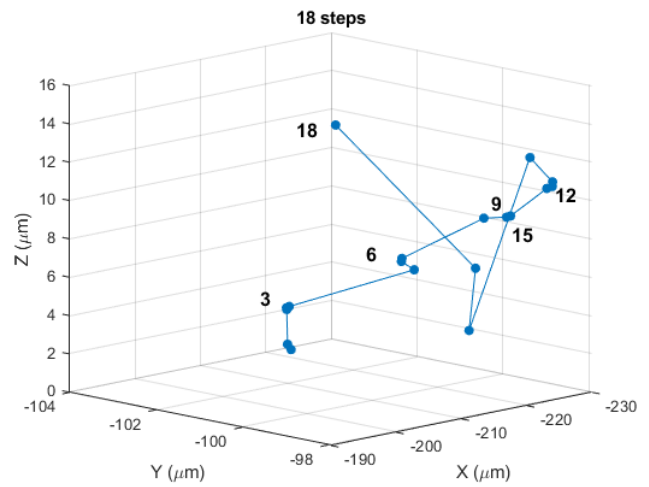

(d)

Figure S.2: Theoretical plots showing probable photon paths with a) 3 steps, b) 5 steps, c) 10 steps, and d) 18 steps before finally getting absorbed in the resin.
